# Supplementary material for: Response to mTOR and PI3K inhibitors in enzalutamide-resistant luminal androgen receptor triple-negative breast cancer patient-derived xenografts
Source: PubMed Central journal article supplement (PMC6993232; doi:10.7150/thno.36182), 2020-01-01
Supplement: thnov10p1531s1.pdf [file thnov10p1531s1.pdf]

Figure S1: Analysis of P-AKT, P-PRAS, P-S6 and P-4EBP1 expression in 3 LAR PDX (HBCx-2, HBCx-31, HBCx-154), LAR cell line (MDA-MB-453) and 3 non LAR PDX (HBCx-8, HBCx-11, HBCx-12A). Graphs represent protein expression (phospho-protein/total protein) determined by western blot analyzed.

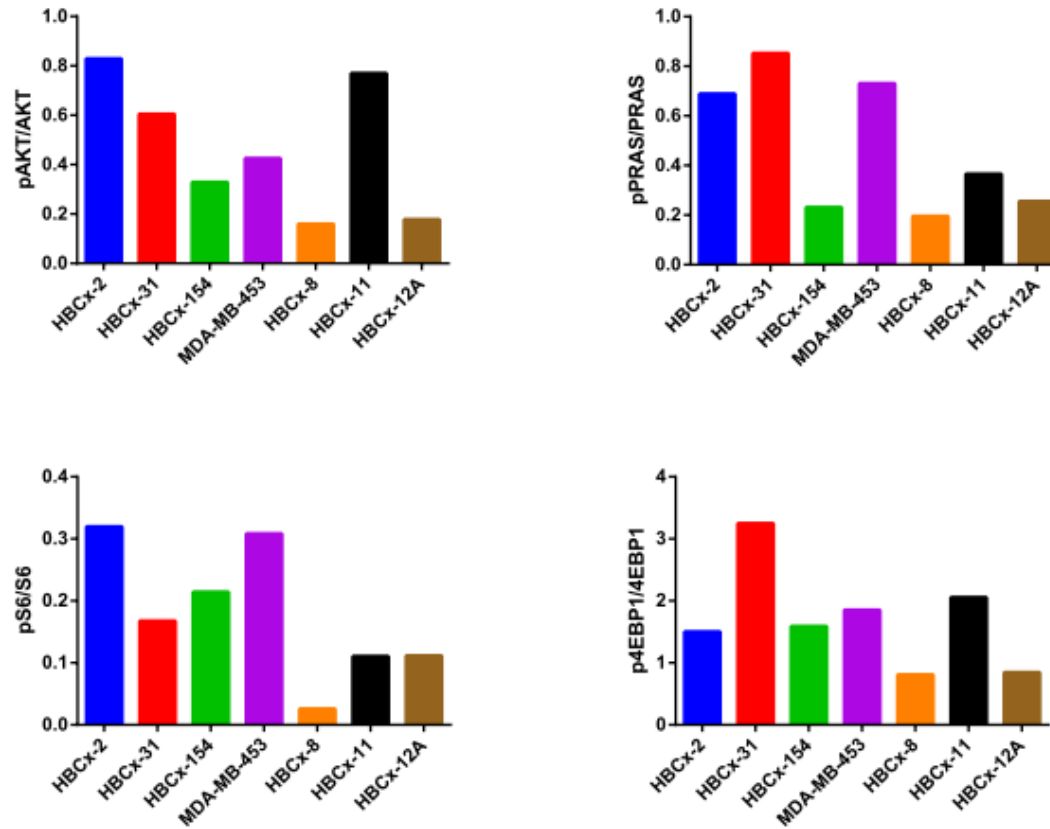

Figure S2: RT-PCR analysis of the expression of AR-related genes (*AR*, *FOXA1*, *PIP*, *TFAP2B*), AR-inducible genes (*FN1*, *SERPINE5*, *S100P*) before (CRL) and after treatment with enzalutamide. Data are normalized by Log2 transformation

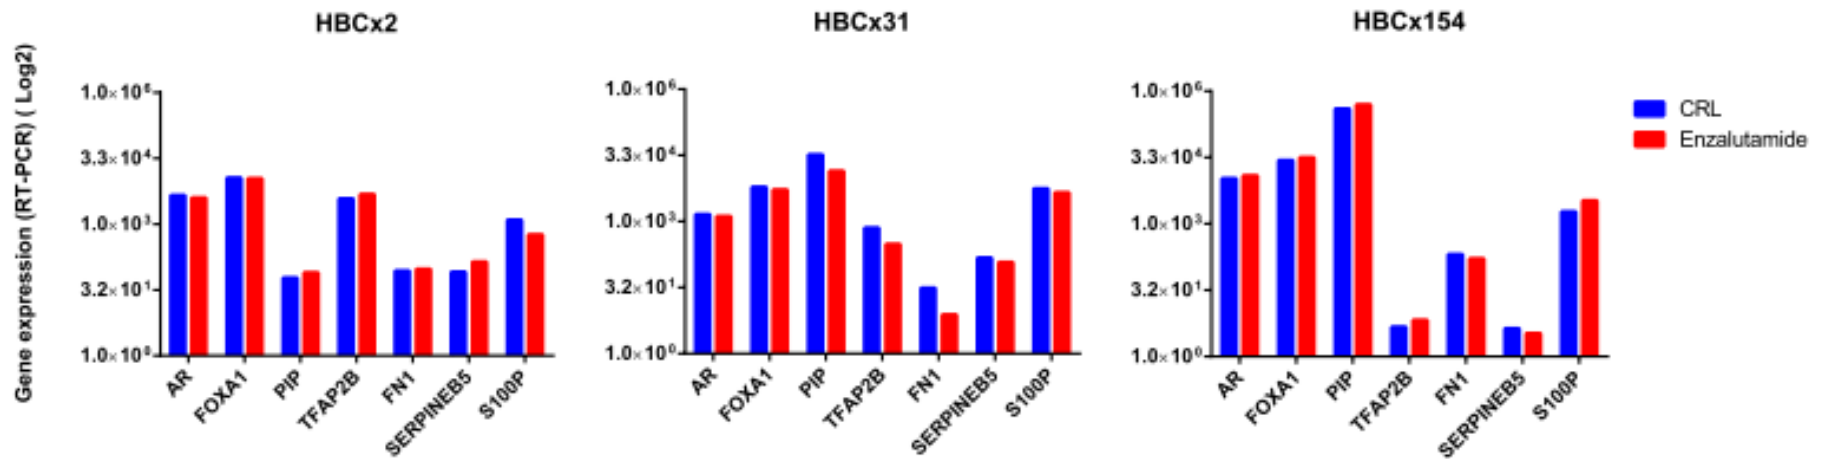

Figure S3: Metastasis-free survival at 10 years (MFS) and overall survival at 10 years (OS) in the TNBC population ( $n=323$ ) (upper panel) and in the AR+ TNBC population ( $n=21$ ) (lower panel)

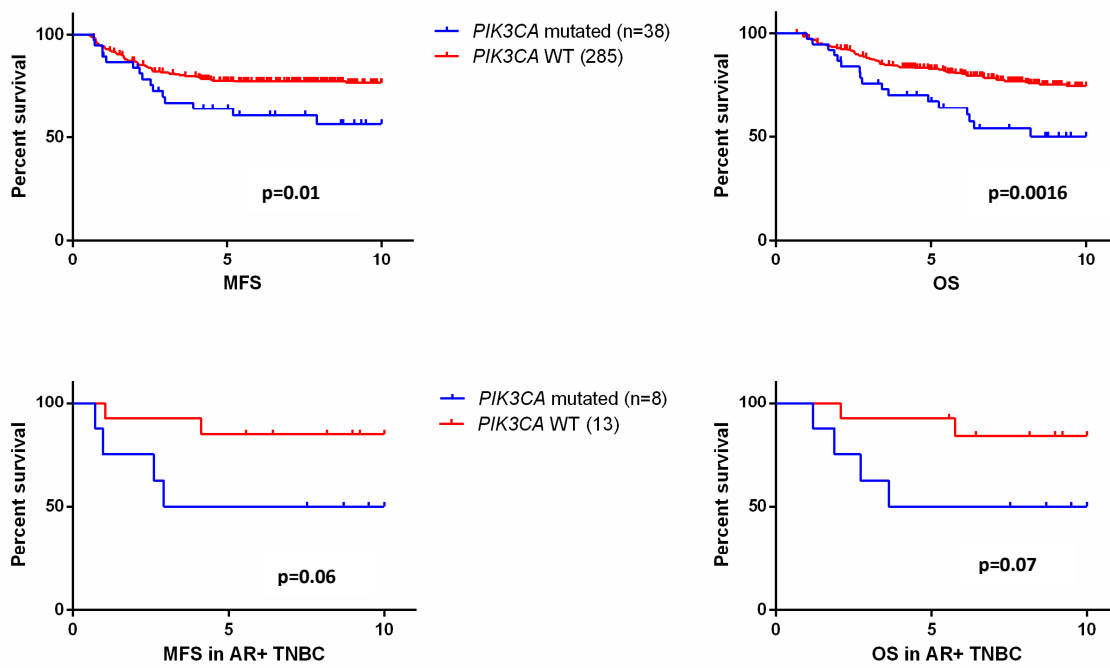

|                                  |             |              |
|----------------------------------|-------------|--------------|
| <b>Mean age in years (range)</b> |             | 56 (28-91)   |
|                                  |             | <i>n</i> (%) |
| <b>T ( TNM)</b>                  | 1           | 115 (35.6)   |
|                                  | 2           | 194 (60)     |
|                                  | 3           | 14 (4.4)     |
| <b>N (TNM)</b>                   | 0           | 200 (62)     |
|                                  | 1           | 79 (25)      |
|                                  | 2           | 30 (9)       |
|                                  | 3           | 12 (4)       |
| <b>SBR</b>                       | 1           | 5 (1.6)      |
|                                  | 2           | 41 (13)      |
|                                  | 3           | 270 (85.4)   |
| <b>Chemotherapy</b>              | Yes         | 246 (84.5)   |
|                                  | No          | 74 (25.5)    |
| <b>Radiotherapy</b>              | Yes         | 242 (83.2)   |
|                                  | No          | 49 (16.8)    |
| <b>Subtype</b>                   | NST         | 220 (68.2)   |
|                                  | Medullary   | 36 (11.1)    |
|                                  | Rare        | 33 (10.2)    |
|                                  | Apocrine    | 21 (6.5)     |
|                                  | Metaplastic | 13 (4)       |
| <b>PIK3CA status</b>             | WT          | 285 (88.2)   |
|                                  | Mutated     | 38 (11.8)    |
| <b>AKT1 status</b>               | WT          | 312 (96.6)   |
|                                  | Mutated     | 11 (3.4)     |

Table S1: Characteristics of the 323 TNBC patients

Table S2: Clinical and genomic characteristics of the LAR PDX models

| PDX      | Type of graft         | Age at diagnosis | T | N | Breast surgery | Node surgery    | Histologic type | LVI | Grade | SBR | RO | RP | HER2 | Chemotherapy    | RT  | <i>PIK3CA</i> status* | <i>AKT</i> status* | Other genomic alterations*     | MFS (months) | Distant relapse (0:no; 1:yes) | OS (months) | Status 0=alive;1=dead |
|----------|-----------------------|------------------|---|---|----------------|-----------------|-----------------|-----|-------|-----|----|----|------|-----------------|-----|-----------------------|--------------------|--------------------------------|--------------|-------------------------------|-------------|-----------------------|
| HBCx-154 | Primary breast cancer | 83               | 1 | 1 | Mastectomy     | Lymphadenectomy | NST             | -   | 3     | -   | -  | -  | -    | No              | No  | M(p.N345K; p.IWT)     |                    | FGFR3 amplification            | 24           | 0                             | 24          | 0                     |
| HBCx-31  | Primary breast cancer | 44               | 2 | 1 | Mastectomy     | Lymphadenectomy | Apocrine        | +   | 3     | -   | -  | -  | -    | (anthracycline) | Yes | WT                    | M (p.E17K)         | TP53 (p.R175H)                 | 8            | 0                             | 8           | 0                     |
| HBCx-35  | Primary breast cancer | 63               | 2 | 1 | Mastectomy     | Lymphadenectomy | NST             | -   | 3     | -   | -  | -  | -    | No              | No  | M (p.H1047R)          | WT                 | FGFR1 and DDR2 amplification   | 25           | 0                             | 25          | 0                     |
| HBCx-2   | Primary breast cancer | 76               | 2 | 1 | Mastectomy     | Lymphadenectomy | NST             | +   | 3     | -   | -  | -  | -    | No              | Yes | WT                    | M (p.E17K)         | FGFR1 and PDGFRA amplification | 11           | 1                             | 15          | 1                     |

NST No special type  
RT Radiotherapy  
LVI Lymphovascular invasion  
\* Genomic analysis of the PDX

Table S3: List of genes tested in NGS

| PATHWAY      | GENES       | NM       |
|--------------|-------------|----------|
| Apoptosis    | APAF1       | 181861.1 |
|              | CASP8       | 001228.4 |
| Cell Cycle   | CDK4        | 000075.3 |
|              | CDK6        | 001259.6 |
|              | CDKN2A      | 000077.4 |
|              | P27/CDKN1B  | 004064.4 |
|              | PPP2R1A     | 014225.5 |
|              | PTPN11      | 002834.3 |
|              | RB1         | 000321.2 |
|              | STAG2       | 006603.4 |
|              | TP53BP1     | 005657.2 |
|              | TP73        | 005427.3 |
| TP53         | 000546.4    |          |
| Development  | FBXW7       | 033632.3 |
|              | NOTCH1      | 017617.3 |
|              | NOTCH2      | 024408.3 |
|              | NOTCH4      | 004557.3 |
| DNA repair   | BRCA1       | 007294.3 |
|              | BRCA2       | 000059.3 |
|              | POLE        | 006231.2 |
| Epigenetic   | ARID1A      | 006015.4 |
|              | CHD4        | 001273.2 |
|              | CREBBP      | 004380.2 |
|              | CTCF        | 006565.3 |
|              | MLL/ KMT2A  | 005933.3 |
|              | MLL2/KMT2D  | 003482.3 |
|              | MLL3/ KMT2C | 170606.2 |
|              | TBL1XR1     | 024665.4 |
| ER pathway   | AR          | 000044.3 |
|              | ESR1        | 000125.3 |
|              | FOXA1       | 004496.3 |
|              | GATA3       | 002051,2 |
|              | NCOR1       | 006311.3 |
|              | PGR         | 000926.4 |
| MAPK pathway | ALK         | 004304.4 |
|              | BRAF        | 004333.4 |
|              | DDR2        | 006182.2 |
|              | FLT1        | 002019.4 |
|              | HRAS        | 005343.2 |
|              | NRAS        | 002524.4 |
|              | KRAS        | 004985.4 |
|              | MAP2K1      | 002755.3 |
|              | MAP2K4      | 003010.3 |
|              | MAP3K1      | 005921.1 |
|              | NF1         | 000267.3 |
|              | RAB40A      | 080879.2 |
| ROS1         | 002944.2    |          |

|                        |          |             |
|------------------------|----------|-------------|
| <b>RTK pathway</b>     | IGF1R    | 000875.4    |
|                        | EGFR     | 005228.3    |
|                        | ERBB2    | 004448.3    |
|                        | ERBB3    | 001982.3    |
|                        | ERBB4    | 005235.2    |
|                        | FGFR1    | 023110.2    |
|                        | FGFR2    | 000141.4    |
|                        | FGFR3    | 000142.4    |
|                        | FGFR4    | 002011.4    |
|                        | KIT      | 000222.2    |
|                        | MET      | 000245.2    |
|                        | RET      | 020975.4    |
|                        | KDR      | 002253.2    |
| PDGFRA                 | 006206.4 |             |
| <b>Matrice pathway</b> | CDH1     | 004360.3    |
|                        | LAMA2    | 000426.3    |
|                        | LAMA4    | 002290.4    |
|                        | THBS1    | 003246.2    |
| <b>PI3K-Akt-mTOR</b>   | AKT1     | 005163.2    |
|                        | AKT2     | 001626.5    |
|                        | AKT3     | 005465.4    |
|                        | INPP4B   | 003866.2    |
|                        | MTOR     | 004958.3    |
|                        | PIK3CA   | 006218.2    |
|                        | PIK3R1   | 181523.2    |
|                        | PTEN     | 000314.4    |
|                        | STK11    | 000455.4    |
|                        | TSC1     | 000368.4    |
|                        | TSC2     | 000548.3    |
| <b>Transcription</b>   | CBFB     | 001755.2    |
|                        | HIST1H3B | 003537.3    |
|                        | MALAT1   | NR_002819.2 |
|                        | MED1     | 004774.3    |
|                        | MYB      | 005375.2    |
|                        | NFE2L2   | 006164.3    |
|                        | RUNX1    | 001754.4    |
|                        | SETD2    | 014159.6    |
|                        | TBX3     | 016569.3    |
| <b>Others</b>          | AGTR2    | 000686.4    |
|                        | APC      | 000038.5    |
|                        | CTNNB1   | 001904.3    |
|                        | KEAP1    | 012289.3    |
|                        | LDLRAP1  | 015627.2    |
|                        | MYH9     | 002473.4    |
|                        | MYO3A    | 017433.4    |
|                        | SF3B1    | 012433.2    |
|                        | STMN2    | 007029.3    |
|                        | VHL      | 000551.3    |

Table S4: Univariate and multivariate (log-rank tests) analysis of metastasis-free survival (MFS) and overall survival (OS) at 10 years in 323 triple-negative breast cancers

|                        | Number of patients | Number of distant metastases (%) | Log-rank test (univariate) MFS | Log-rank test (multivariate) MFS | Number of Death (%) | Log-rank test (univariate) OS | Log-rank test (multivariate) OS |
|------------------------|--------------------|----------------------------------|--------------------------------|----------------------------------|---------------------|-------------------------------|---------------------------------|
| <b>Years</b>           |                    |                                  |                                |                                  |                     |                               |                                 |
| <50                    | 117                | 28 (24%)                         |                                |                                  | 28 (24%)            |                               |                                 |
| >50                    | 206                | 53 (25%)                         | 0.3                            | NR                               | 57 (27.6%)          | 0.17                          | NR                              |
| <b>T (TNM)</b>         |                    |                                  |                                |                                  |                     |                               |                                 |
| T1                     | 115                | 19 (16.5%)                       |                                |                                  | 20 (17.4%)          |                               |                                 |
| T2                     | 194                | 56 (28.8%)                       |                                |                                  | 59 (30.4%)          |                               |                                 |
| T3                     | 14                 | 6 (4.2%)                         | <b>0.0034</b>                  | <b>0.03</b>                      | 6 (42.8%)           | <b>0.0055</b>                 | 0.026                           |
| <b>N (TNM)</b>         |                    |                                  |                                |                                  |                     |                               |                                 |
| N0                     | 200                | 33 (16.5%)                       |                                |                                  | 32 (16%)            |                               |                                 |
| N1                     | 79                 | 25 (31.6%)                       |                                |                                  | 28 (35.4%)          |                               |                                 |
| N2                     | 30                 | 14 (46.6%)                       |                                |                                  | 16 (53.3%)          |                               |                                 |
| N3                     | 12                 | 9 (75%)                          | <b>&lt; 0.0001</b>             | <b>&lt; 0.0001</b>               | 9 (75%)             | <b>&lt; 0.0001</b>            | <b>&lt; 0.0001</b>              |
| <b>Grade SBR</b>       |                    |                                  |                                |                                  |                     |                               |                                 |
| SBR1                   | 5                  | 1 (20%)                          |                                |                                  | 1 (20%)             |                               |                                 |
| SBR2                   | 41                 | 13 (31.7%)                       |                                |                                  | 14 (34.1%)          |                               |                                 |
| SBR3                   | 270                | 66 (24.4%)                       | 0.9                            | NR                               | 67 (24.8%)          | 0.7358                        | NR                              |
| <b>Radiotherapy</b>    |                    |                                  |                                |                                  |                     |                               |                                 |
| Yes                    | 242                | 64 (26.5%)                       |                                |                                  | 65 (26.8%)          |                               |                                 |
| No                     | 49                 | 15 (30%)                         | 0.37                           | NR                               | 14 (28.6%)          | 0.6424                        | NR                              |
| <b>Chemotherapy</b>    |                    |                                  |                                |                                  |                     |                               |                                 |
| Yes                    | 246                | 56 (22.7%)                       |                                |                                  | 57 (23.1%)          |                               |                                 |
| No                     | 74                 | 23 (31%)                         | 0.07                           | NR                               | 26 (35.1%)          | <b>0.0203</b>                 | 0.07                            |
| <b>Subtype</b>         |                    |                                  |                                |                                  |                     |                               |                                 |
| Apocrine               | 21                 | 6 (28.5%)                        |                                |                                  | 6 (28.5%)           |                               |                                 |
| Metaplastic            | 13                 | 5 (38%)                          |                                |                                  | 5 (38.4%)           |                               |                                 |
| Medullary              | 36                 | 2 (5.5%)                         |                                |                                  | 5 (13.8%)           |                               |                                 |
| NST                    | 220                | 59 (26.8%)                       |                                |                                  | 57 (26%)            |                               |                                 |
| Rare                   | 33                 | 9 (27%)                          | <b>0.046</b>                   | <b>0.0023</b>                    | 12 (36.3%)          | <b>0.0493</b>                 | <b>0.012</b>                    |
| <b>PIK3Ca mutation</b> |                    |                                  |                                |                                  |                     |                               |                                 |
| PIK3CA mutated         | 38                 | 15 (39.4%)                       |                                |                                  | 17 (44.7%)          |                               |                                 |
| PIK3CA WT              | 285                | 66 (23.1%)                       | <b>0.01</b>                    | 0.39                             | 63 (22%)            | <b>0.0016</b>                 | 0.24                            |

NR: not relevant
